# Supplementary material
Source: PubMed Central journal article supplement (PMC1890845)
Supplement: blood_blood-2006-10-051318_1.pdf [file blood_blood-2006-10-051318_1.pdf]

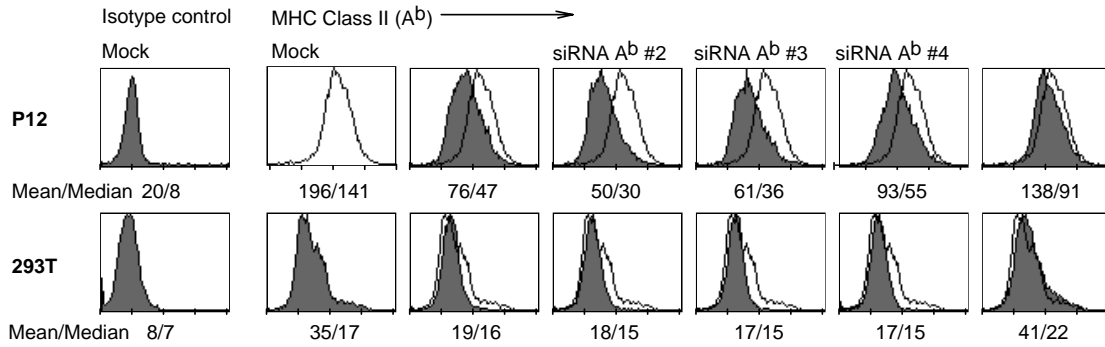

### Sequences of the siRNAoligonucleotides for the $\alpha$ chain of A<sup>b</sup>

Seq#1: 5'- GGCACCTATGGTATAAGTGTT -3'      Seq#3: 5'- GTCGCAGACGGTGT TTTATGTT-3'  
 3'- TTCCGTGGATACCATATTCAC -5'                      3'- TTCAGCGTCTGCCACAAATAC -5'

Seq#2: 5'- GAAGGAGACTGTCTGGATGTT-3'      Seq#4: 5'- GCTGTCTTATCTCACCTTCTT-3'  
 3'- TTCTTCCTCTGACAGACCTAC -5'                      3'- TTCGACAGAATAGAGTGGAAG -5'
