# Supplementary material
Source: PubMed Central journal article supplement (PMC1890845)
Supplement: blood_blood-2006-10-051318_2.pdf [file blood_blood-2006-10-051318_2.pdf]

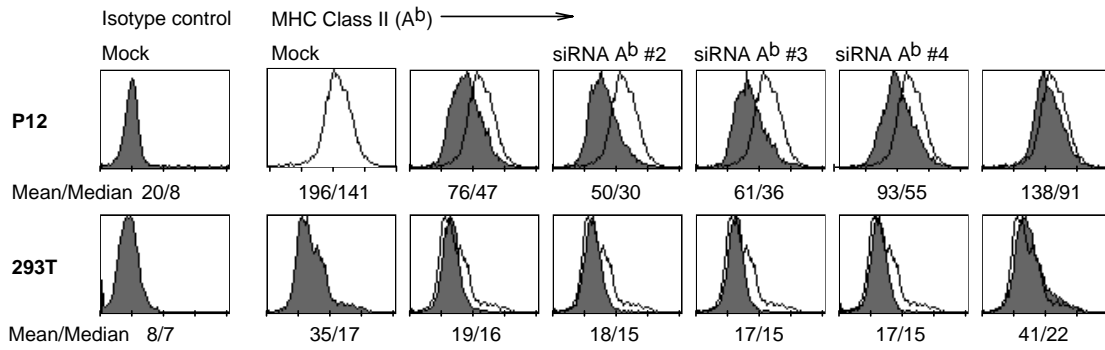

### Sequences of the siRNAoligonucleotides for the $\alpha$ chain of A<sup>b</sup>

Seq#5: 5'- GACGACATTGAGGCCGACCTT -3'      Seq#7: 5'- GAAGTGGTGTGCTGGGTGATT-3'  
 3'- TTCTGCTGTAACTCCGGCTGG -5'                      3'- TTCTTCACCACACGACCCACT -5'

Seq#6: 5'- GGCCTGCGATCAGGTGGCATT -3'      Seq#8: 5'- GTTACATCTACTGCAGACTTT -3'  
 3'- TTCCGGACGCTAGTCCACCGT -5'                      3'- TTCAATGTAGATGACGTCTGA -5'
