# Supplementary material
Source: PubMed Central journal article supplement (PMC1890845)
Supplement: blood_blood-2006-10-051318_3.pdf [file blood_blood-2006-10-051318_3.pdf]

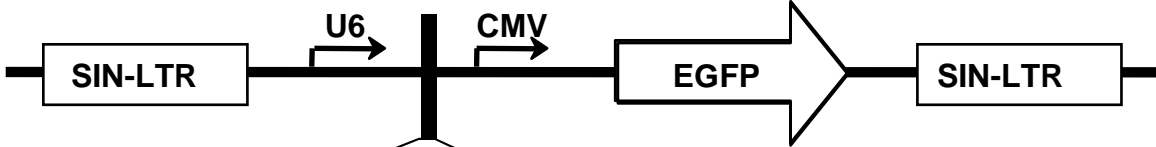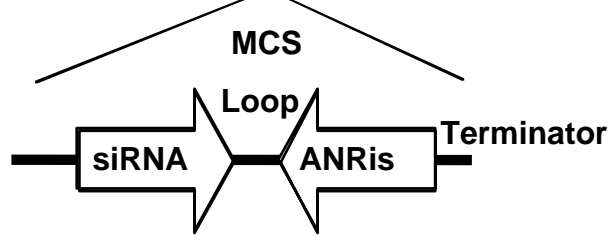

Cell lines generated

|               |                |                     |      |   |                  |
|---------------|----------------|---------------------|------|---|------------------|
| sh RNA LacZ:  | 5' $\tilde{O}$ | GUGACCAGCGAAUACCUGU | TC A | → | MB49 LacZ(i)     |
|               | 3' $\tilde{O}$ | CACUGGUCGCUUAUGGACA | AG A |   |                  |
| or            |                |                     |      |   |                  |
| sh RNA Ab #2: | 5' $\tilde{O}$ | GAAGGAGACUGUCUGGAUG | TC A | → | MB49 Ab(i)       |
|               | 3' $\tilde{O}$ | CUUCCUCUGACAGACCUAA | AG A |   |                  |
| or            |                |                     |      |   |                  |
| no sh RNA     |                |                     |      | → | MB49 $\emptyset$ |
