# Supplementary material
Source: PubMed Central journal article supplement (PMC1890845)

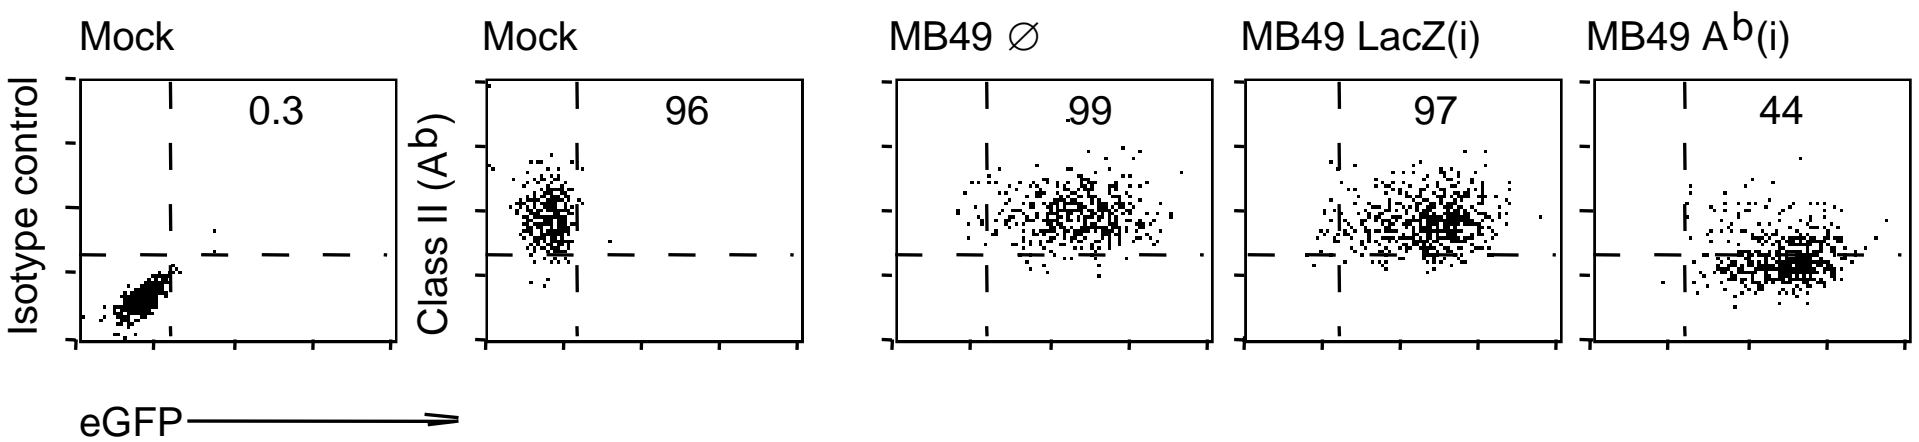

Supplement: blood_blood-2006-10-051318_4.pdf [file blood_blood-2006-10-051318_4.pdf]

(-)

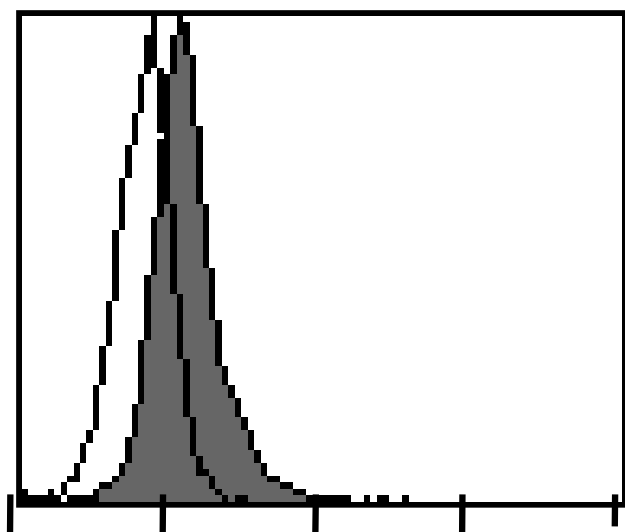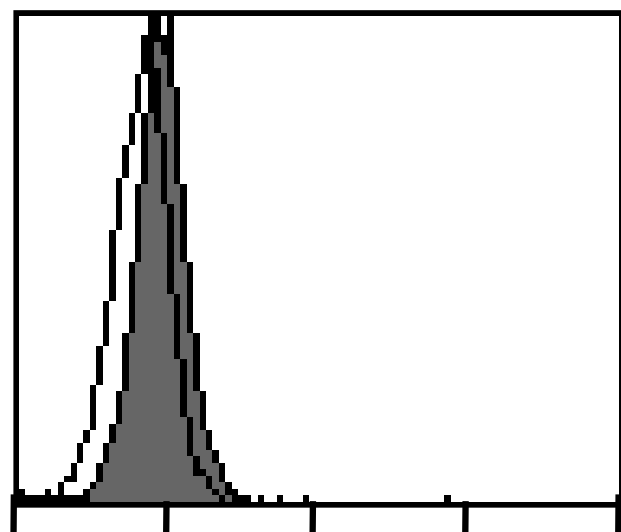

+ IFN- $\gamma$

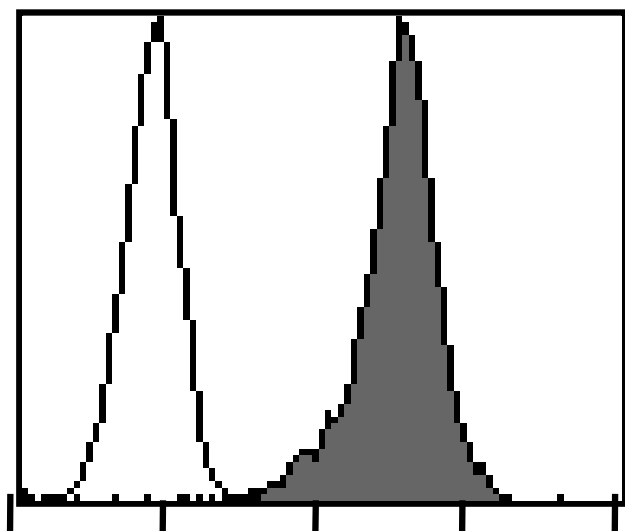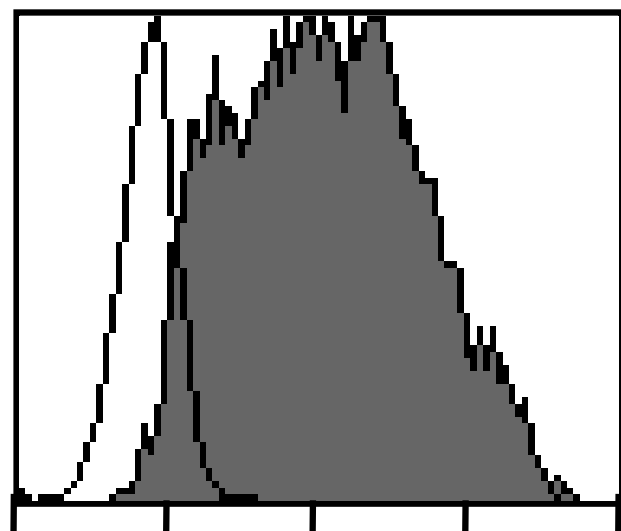

MHC class I (D<sup>b</sup>)

MHC class II (A<sup>b</sup>)

Supplement: blood_blood-2006-10-051318_5.pdf [file blood_blood-2006-10-051318_5.pdf]

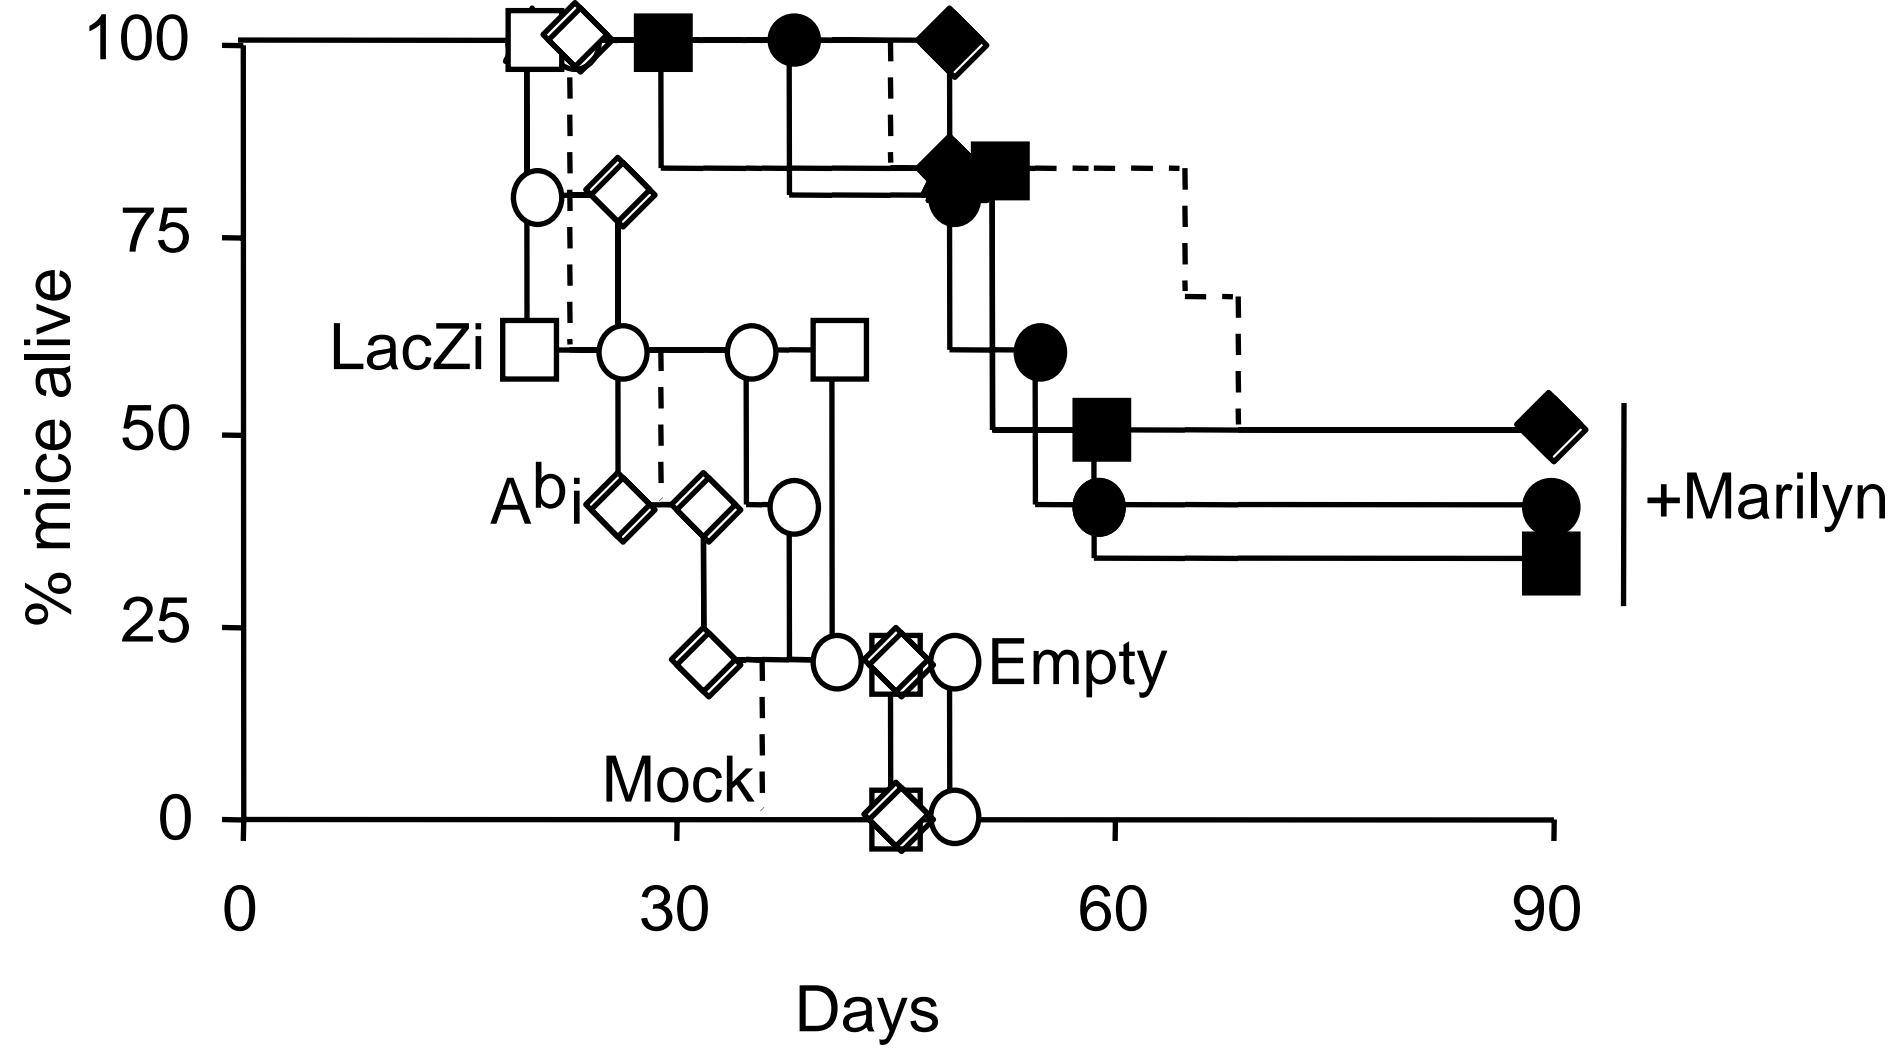

Supplement: blood_blood-2006-10-051318_6.pdf [file blood_blood-2006-10-051318_6.pdf]

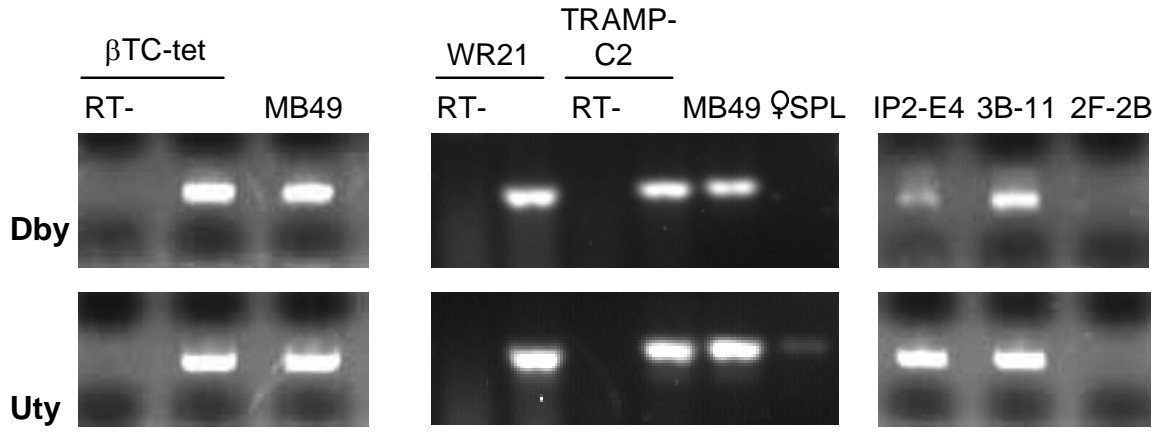

Supplement: blood_blood-2006-10-051318_7.pdf [file blood_blood-2006-10-051318_7.pdf]

+Marilyn

+Marilyn+MB49

+Marilyn+MB49  
+Immun.

♀B6+Immun.

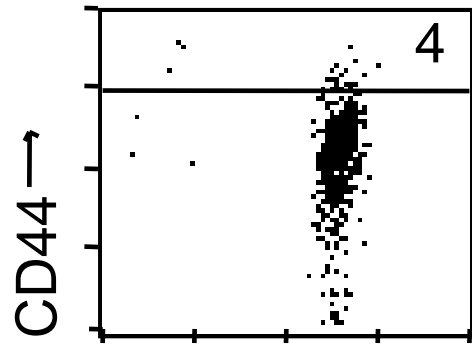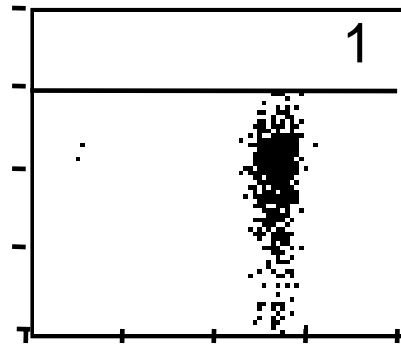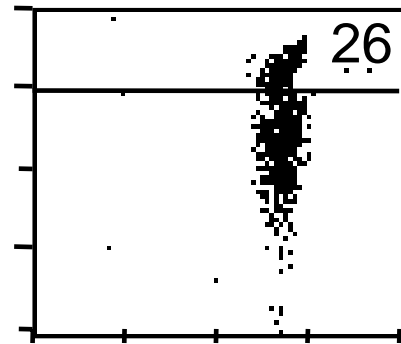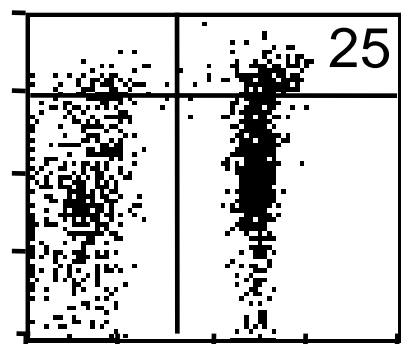

CD44 →

CD4 →

Supplement: blood_blood-2006-10-051318_8.pdf [file blood_blood-2006-10-051318_8.pdf]

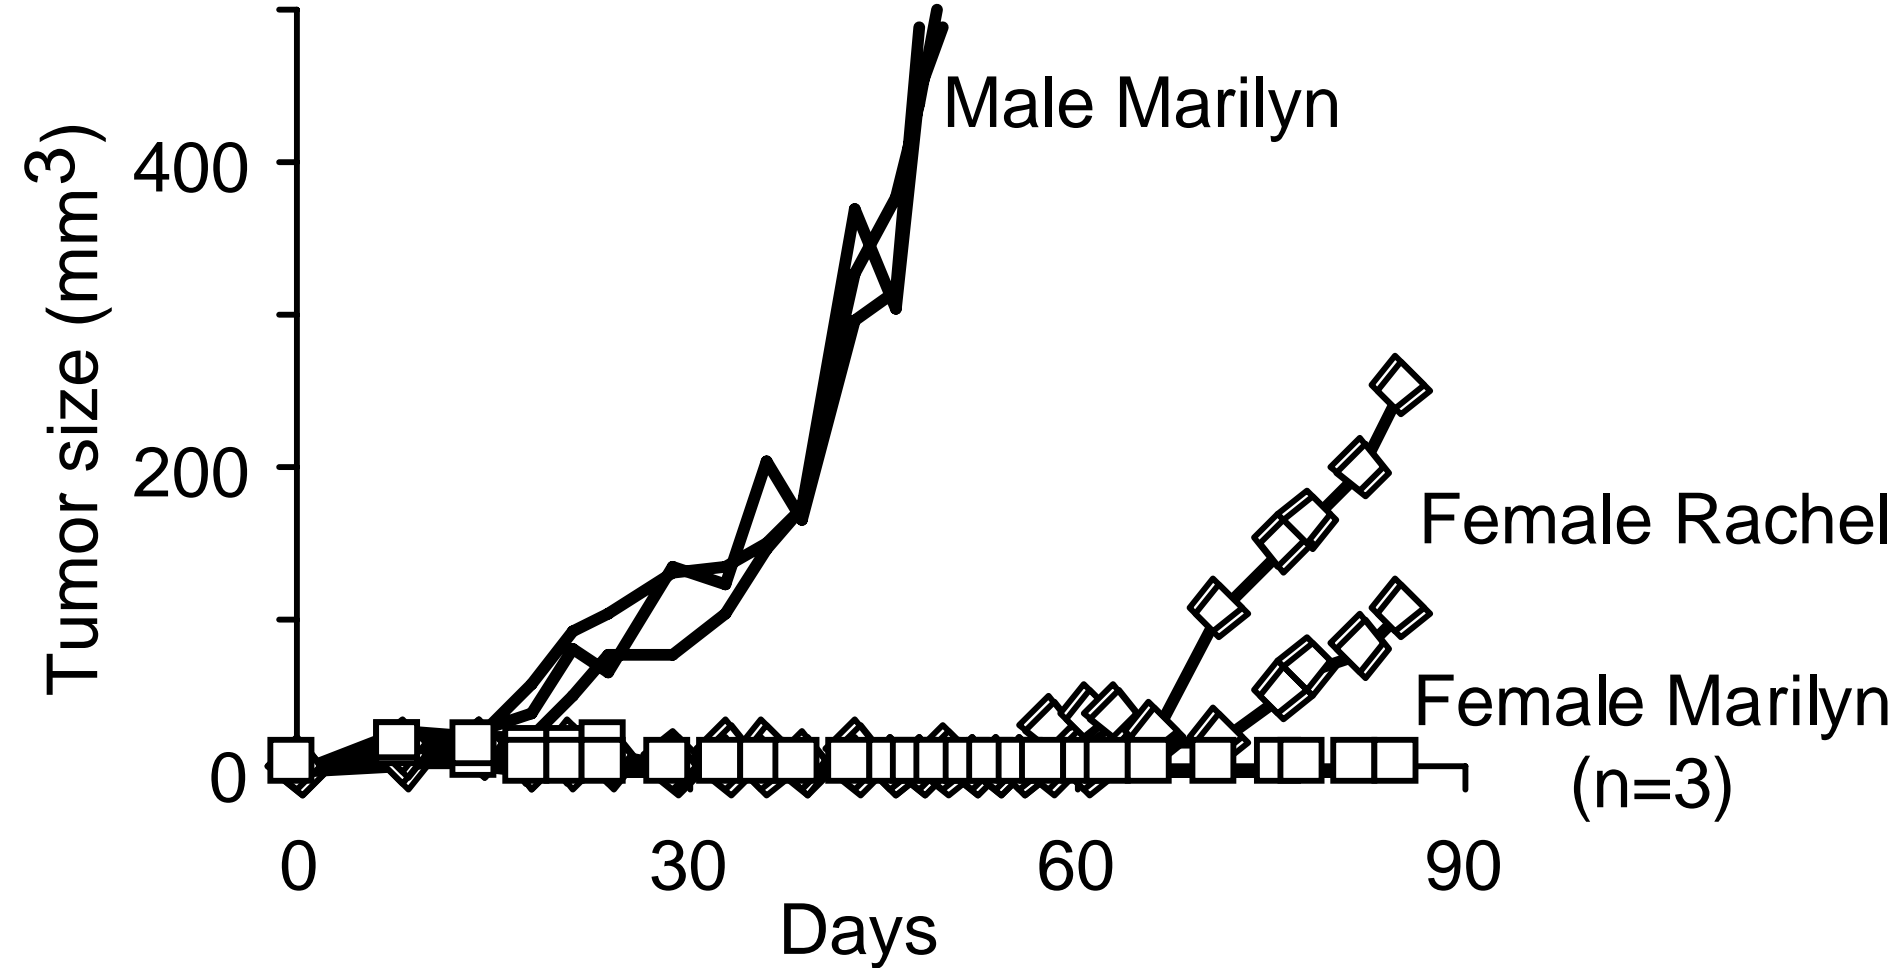

Supplement: blood_blood-2006-10-051318_9.pdf [file blood_blood-2006-10-051318_9.pdf]
